# Supplementary material for: The binary boron lithium clusters B12Lin with n = 1–14: in search for hydrogen storage materials
Source: Royal Society of Chemistry journal article supplement (doi:10.1039/d1cp03682c), 2021-01-01
Supplement: d1cp03682c3.pdf [file d1cp03682c3.pdf]

## **Supplementary Information**

### **The binary boron lithium clusters $B_{12}Li_n$ with $n = 3 - 14$ : In search for hydrogen storage materials**

**Long Van Duong,<sup>a,b,\*</sup> Nguyen Thanh Si,<sup>c</sup> Nguyen Phi Hung,<sup>b</sup> and Minh Tho Nguyen<sup>a,d,\*</sup>**

*<sup>a</sup> Institute for Computational Science and Technology (ICST), Ho Chi Minh City, Vietnam*

*Email: long.dv@icst.org.vn*

*<sup>b</sup> Department of Chemistry, Quy Nhon University, Quy Nhon, Vietnam*

*<sup>c</sup> Department of Chemistry, Can Tho University, Can Tho, Vietnam*

*<sup>d</sup> Department of Chemistry, KU Leuven, B-3001 Leuven, Belgium*

*Email: minh.nguyen@kuleuven.be*

#### **1. Assessments of the performance of different functionals for the search of stable binary boron lithium clusters.**

The TPSSh<sup>1</sup> and PBE0<sup>2</sup> functionals in conjunction with the 6-311+G(d)<sup>3,4</sup> or def2-TZVP<sup>5,6</sup> basis sets were intensively used for searching the stable geometries and evaluating the relative energies between isomers of pure boron and boron doped clusters.<sup>7-13</sup> Recently, some authors proposed that the HSE06<sup>14</sup> or M06-2X<sup>15</sup> functionals could produce good geometries for boron based compounds.<sup>16,17</sup> To further confirm that calculations at the TPSSh/6-311+G(d) level provide us with enough accuracy compared to other high accuracy wavefunction levels, we consider three lowest-lying isomers of  $B_{12}Li$ <sup>18</sup> (the **1A**, **1B**, and **1C** in Figure 1) to perform a benchmark test for these functionals and basis sets. The B3LYP,<sup>19,20</sup> M06,<sup>15</sup> wB97X<sup>21</sup> and wB97XD<sup>22</sup> functionals are also considered to ensure a greater diversity of approximations and approaches. Results of optimization calculations at the DFT/6-311+G(d) or DFT/def2-TZVP are then evaluated by performing single point electronic energy computations with the high accuracy coupled cluster

theory (U)CCSD(T) with the cc-pVTZ basis set. Obtained results are shown in Table S1 along with the root mean square (RMS) of energies differences. The TPSSh/6-311+G(d) level appears to give the most accurate results in all three isomers considered. The RSM = 0 value confirms it to be the most suitable theoretical level in the study of  $B_xLi_y$  clusters. It is also easily recognized that the 6-311+G(d) basis set gives better geometric optimization results than the def2-TZVP. The HSE06/6-311+G(d) and PBE0/6-311+G(d) are two next best levels following by B3LYP/6-311+G(d). The remaining theoretical levels are not recommended in investigation of the geometry and energy of  $B_xLi_y$  clusters.

**Table S1.** (U)CCSD(T)/cc-pVTZ energies with respect to the lowest energy geometry of each species as optimized by each functional. Energies are in kcal/mol.

|                   | <b>1A</b> | <b>1B</b> | <b>1C</b> | RMS  |
|-------------------|-----------|-----------|-----------|------|
| B3LYP/6-311+G(d)  | 0.47      | 0.53      | 0.51      | 0.50 |
| HSE06/6-311+G(d)  | 0.32      | 0.39      | 0.37      | 0.36 |
| HSE06/ def2-TZVP  | 0.69      | 0.86      | 0.79      | 0.78 |
| M06/6-311+G(d)    | 1.33      | 1.21      | 1.18      | 1.24 |
| M06-2X/6-311+G(d) | 1.28      | 0.98      | 1.02      | 1.10 |
| M06-2X/ def2-TZVP | 1.69      | 1.55      | 1.60      | 1.61 |
| PBE0/6-311+G(d)   | 0.35      | 0.40      | 0.38      | 0.37 |
| PBE0/ def2-TZVP   | 0.69      | 0.84      | 0.77      | 0.77 |
| TPSSh/6-311+G(d)  | 0.00      | 0.00      | 0.00      | 0.00 |
| TPSSh/def2-TZVP   | 0.19      | 0.31      | 0.26      | 0.26 |
| wB97X/6-311+G(d)  | 1.23      | 0.97      | 1.08      | 1.10 |
| wB97XD/6-311+G(d) | 1.00      | 0.72      | 0.71      | 0.82 |

Figure S1 presents the relative energies  $\Delta_{21}$  and  $\Delta_{31}$  of the isomer **1B** and **1C** with respect to the most stable isomer **1A** of the DFT and CCSD(T)/cc-pVTZ calculations. In the context that the structure cannot be optimized at the CCSD(T) level, we use single point CCSD(T) electronic energy from TPSSh/6-311+G(d) geometries as reference energies. The most serious error occurs for two levels B3LYP/6-311+G(d) and wB97XD/6-311+G(d): relative energies of the B3LYP is too small while that of wB97XD is too large, as compared to reference energies.

Results of the HSE06, PBE0, TPSSh functionals in conjunction with 6-311+G(d) basis set are better than those using def2-TZVP basis set. Finally, we would conclude that **the TPSSh/6-311+G(d) level is a adequate level to produce good geometries and to evaluate reliable relative energies of the  $B_xLi_y$  clusters.**

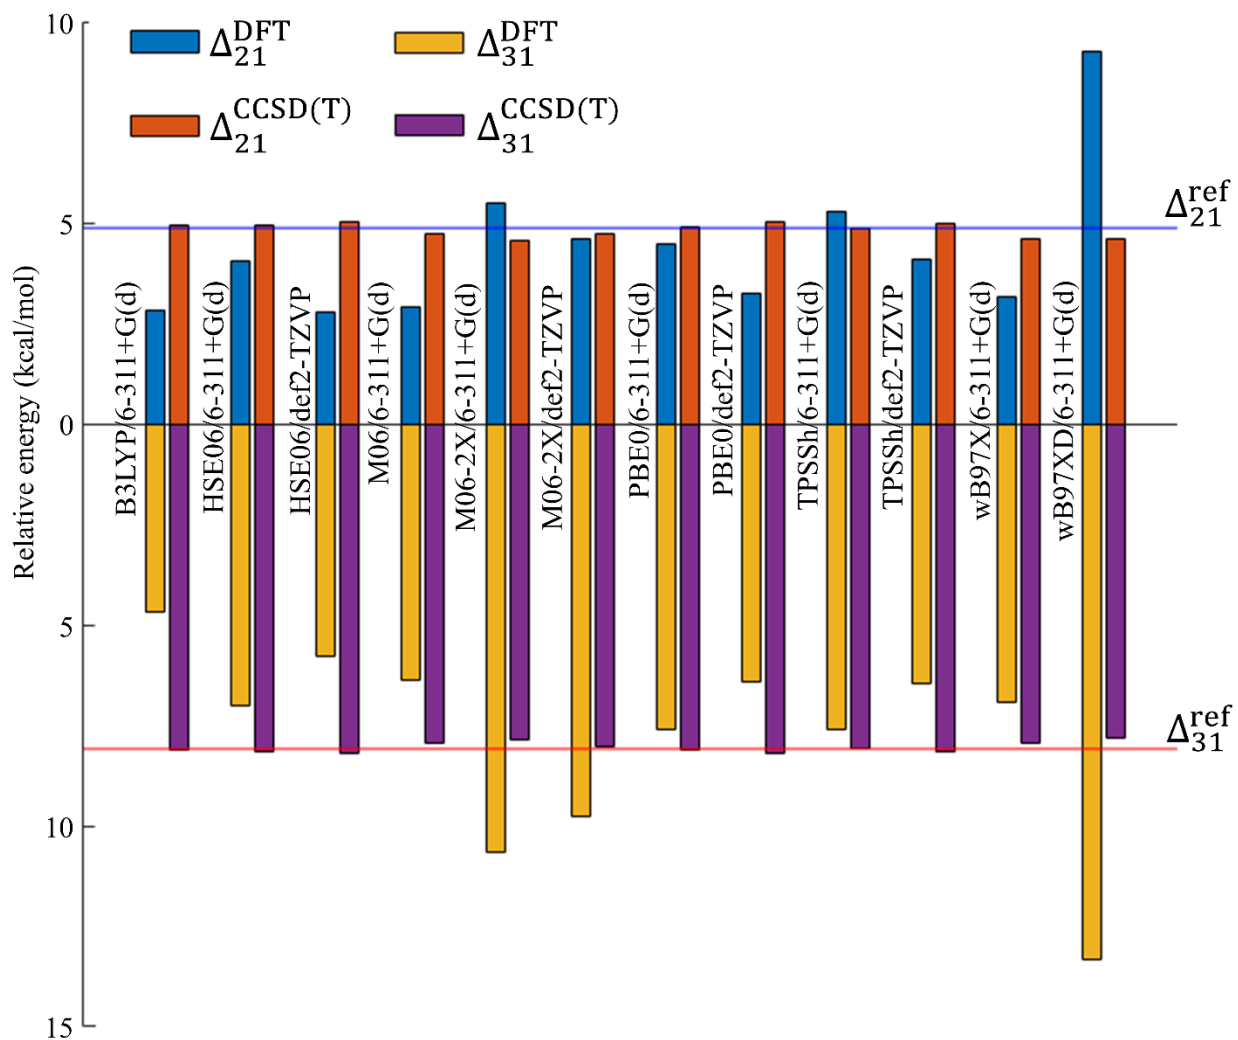

**Figure S1.** Relative energies  $\Delta_{21}$  and  $\Delta_{31}$  of isomers **1B** and **1C** with respect to the lowest-lying **1A** from DFT and CCSD(T)/cc-pVTZ calculations. The  $\Delta_{21}^{ref}$  and  $\Delta_{31}^{ref}$  lines are taken the CCSD(T)/cc-pVTZ energies at TPSSh/6-311+G(d) optimized geometries.

## 2. Average absorption energy survey with different functionals

The average adsorption energies ( $E_{\text{abs}}$ ) of the **8A**- $m\text{H}_2$  systems with  $m = 1, 8, 16, 24, 32$  and  $40$  determined using the TPSSh, M06, M06-2X, wB97X, and wB97XD functionals in conjunction with the 6-311++G(2d,2p)<sup>3,4</sup> basis set are shown in Table S2.

The TPSSh functional is not suitable for the study of hydrogen absorption because its  $E_{\text{abs}}$  values are significantly small as compared to results obtained from other functionals with  $m = 1, 8$  and  $16$ , and the **8A**- $24\text{H}_2$  complex is broken. The four commonly used functionals M06, M06-2X, wB97X and wB97XD in the hydrogen adsorption capacity survey give results quite close to each other, but with a better performance for the wB97XD and M06.

**Table S2.** Average absorption energy of the **8A**- $m\text{H}_2$  systems with  $m = 1; 8; 16; 24; 32; \text{ and } 40$  in different functionals in conjunction with 6-311++G(2d,2p) basis set.

|        | 1H <sub>2</sub> | 8H <sub>2</sub> | 16H <sub>2</sub> | 24H <sub>2</sub> | 32H <sub>2</sub> | 40H <sub>2</sub> |
|--------|-----------------|-----------------|------------------|------------------|------------------|------------------|
| TPSSh  | 0.091           | 0.083           | 0.052            | --               | --               | --               |
| M06    | 0.141           | 0.129           | 0.117            | 0.110            | 0.110            | 0.096            |
| M06-2X | 0.128           | 0.112           | 0.096            | 0.086            | 0.080            | 0.069            |
| wB97X  | 0.123           | 0.108           | 0.095            | 0.087            | 0.083            | 0.074            |
| wB97XD | 0.149           | 0.130           | 0.116            | 0.103            | 0.095            | 0.081            |

## 3. Cartesian coordinates of lower-lying isomers

Cartesian coordinates of some optimized structures computed at the TPSSh/6-311+G(d) level. The sum of bond orders (SBOs) and net atomic charges (NACs) of each atom are also given.

### 0A (B<sub>12</sub>)

| Atom | X           | Y           | Z           | SBOs | NACs  |
|------|-------------|-------------|-------------|------|-------|
| B    | -1.60165900 | 1.82554200  | -0.18402700 | 3.19 | -0.07 |
| B    | 1.60165900  | 1.82554200  | -0.18402700 | 3.19 | -0.07 |
| B    | -2.38179500 | 0.47430700  | -0.18402700 | 3.19 | -0.07 |
| B    | 2.38179500  | 0.47430700  | -0.18402700 | 3.19 | -0.07 |
| B    | -0.78013600 | -2.29984900 | -0.18402700 | 3.19 | -0.07 |

|   |             |             |             |      |       |
|---|-------------|-------------|-------------|------|-------|
| B | 0.78013600  | -2.29984900 | -0.18402700 | 3.19 | -0.07 |
| B | -1.75673700 | -1.01425300 | -0.04377200 | 3.23 | 0.06  |
| B | 1.75673700  | -1.01425300 | -0.04377200 | 3.23 | 0.06  |
| B | 0.00000000  | 2.02850500  | -0.04377200 | 3.23 | 0.06  |
| B | -0.84393500 | 0.48724600  | 0.41182600  | 3.55 | 0.08  |
| B | 0.84393500  | 0.48724600  | 0.41182600  | 3.55 | 0.08  |
| B | 0.00000000  | -0.97449200 | 0.41182600  | 3.55 | 0.08  |

### 1A (B<sub>12</sub>Li)

| Atom | X           | Y           | Z           | SBOs | NACs  |
|------|-------------|-------------|-------------|------|-------|
| B    | -0.17968600 | 2.32511300  | -0.77140500 | 3.33 | -0.13 |
| B    | -0.17968600 | 2.32511300  | 0.77140500  | 3.33 | -0.13 |
| B    | -0.15230200 | -0.45876100 | -2.30339100 | 3.36 | -0.12 |
| B    | -0.15230200 | -0.45876100 | 2.30339100  | 3.36 | -0.12 |
| B    | 0.00546000  | 1.02607000  | -1.71817100 | 3.43 | -0.01 |
| B    | 0.00546000  | 1.02607000  | 1.71817100  | 3.43 | -0.01 |
| B    | -0.01297100 | -2.14989300 | 0.00000000  | 3.45 | -0.07 |
| B    | -0.14488200 | -1.80585200 | 1.53383700  | 3.46 | -0.14 |
| B    | -0.14488200 | -1.80585200 | -1.53383700 | 3.46 | -0.14 |
| B    | 0.67718500  | -0.44673400 | -0.84033500 | 3.57 | 0.01  |
| B    | 0.67718500  | -0.44673400 | 0.84033500  | 3.57 | 0.01  |
| B    | 0.53000800  | 1.00368800  | 0.00000000  | 3.75 | 0.02  |
| Li   | -1.54764600 | -0.22244600 | 0.00000000  | 0.35 | 0.82  |

### 2A (B<sub>12</sub>Li<sub>2</sub>)

| Atom | X           | Y           | Z           | SBOs | NACs  |
|------|-------------|-------------|-------------|------|-------|
| B    | 0.00000000  | 1.60580600  | 0.76820000  | 3.65 | -0.13 |
| B    | 1.39066900  | 0.80290300  | 0.76820000  | 3.65 | -0.13 |
| B    | -1.39066900 | 0.80290300  | 0.76820000  | 3.65 | -0.13 |
| B    | 1.39066900  | -0.80290300 | 0.76820000  | 3.65 | -0.13 |
| B    | -1.39066900 | -0.80290300 | 0.76820000  | 3.65 | -0.13 |
| B    | 0.00000000  | -1.60580600 | 0.76820000  | 3.65 | -0.13 |
| B    | -0.80290300 | 1.39066900  | -0.76820000 | 3.65 | -0.13 |
| B    | 0.80290300  | 1.39066900  | -0.76820000 | 3.65 | -0.13 |
| B    | -1.60580600 | 0.00000000  | -0.76820000 | 3.65 | -0.13 |
| B    | 1.60580600  | 0.00000000  | -0.76820000 | 3.65 | -0.13 |
| B    | -0.80290300 | -1.39066900 | -0.76820000 | 3.65 | -0.13 |
| B    | 0.80290300  | -1.39066900 | -0.76820000 | 3.65 | -0.13 |
| Li   | 0.00000000  | 0.00000000  | -2.30391600 | 0.52 | 0.77  |
| Li   | 0.00000000  | 0.00000000  | 2.30391600  | 0.52 | 0.77  |

**3A (B<sub>12</sub>Li<sub>3</sub>)**

| Atom | X           | Y           | Z           | SBOs | NACs  |
|------|-------------|-------------|-------------|------|-------|
| B    | -0.10183700 | -2.57871100 | 0.00000000  | 3.38 | 0.01  |
| B    | 1.00496900  | -1.12341800 | 0.00000000  | 3.45 | 0.08  |
| B    | 0.03743600  | -1.81313700 | -1.34848800 | 3.58 | -0.26 |
| B    | 0.03743600  | -1.81313700 | 1.34848800  | 3.58 | -0.26 |
| B    | -0.19464500 | 2.42524100  | -0.78209000 | 3.67 | -0.15 |
| B    | -0.19464500 | 2.42524100  | 0.78209000  | 3.67 | -0.15 |
| B    | 0.20647200  | 1.26527000  | -1.67986700 | 3.78 | -0.41 |
| B    | 0.20647200  | 1.26527000  | 1.67986700  | 3.78 | -0.41 |
| B    | -0.56984600 | 0.86094100  | 0.00000000  | 3.87 | -0.05 |
| B    | 0.57202800  | -0.29609000 | -1.45080000 | 3.96 | -0.21 |
| B    | 0.57202800  | -0.29609000 | 1.45080000  | 3.96 | -0.21 |
| B    | -0.76227700 | -0.84030800 | 0.00000000  | 4.06 | -0.48 |
| Li   | -1.55668800 | -0.17617300 | -1.95252000 | 0.38 | 0.84  |
| Li   | -1.55668800 | -0.17617300 | 1.95252000  | 0.38 | 0.84  |
| Li   | 1.75739100  | 1.21722900  | 0.00000000  | 0.41 | 0.83  |

**4A (B<sub>12</sub>Li<sub>4</sub>)**

| Atom | X           | Y           | Z           | SBOs | NACs  |
|------|-------------|-------------|-------------|------|-------|
| B    | -1.32940600 | -1.00877800 | -1.51268000 | 3.60 | -0.20 |
| B    | -1.32940600 | -1.00877800 | 1.51268000  | 3.60 | -0.20 |
| B    | 2.23294800  | -0.57202300 | 0.00000000  | 3.61 | -0.18 |
| B    | 0.09004700  | -0.65700000 | -2.02751100 | 3.76 | -0.24 |
| B    | 0.09004700  | -0.65700000 | 2.02751100  | 3.76 | -0.24 |
| B    | 1.51621400  | -0.37633700 | -1.37345700 | 3.81 | -0.30 |
| B    | 1.51621400  | -0.37633700 | 1.37345700  | 3.81 | -0.30 |
| B    | -1.77863900 | -0.77102300 | 0.00000000  | 3.83 | -0.24 |
| B    | 1.11420300  | 0.77267200  | 0.00000000  | 3.88 | -0.03 |
| B    | -0.75203700 | 0.49279300  | -0.91729400 | 4.14 | -0.14 |
| B    | -0.75203700 | 0.49279300  | 0.91729400  | 4.14 | -0.14 |
| B    | -0.20828300 | 1.74698600  | 0.00000000  | 4.41 | -1.16 |
| Li   | 0.29871400  | -1.92754100 | 0.00000000  | 0.36 | 0.86  |
| Li   | -2.38387800 | 1.66684000  | 0.00000000  | 0.38 | 0.84  |
| Li   | 0.70102900  | 1.73204500  | -1.97563000 | 0.42 | 0.83  |
| Li   | 0.70102900  | 1.73204500  | 1.97563000  | 0.42 | 0.83  |

**4E (B<sub>12</sub>Li<sub>4</sub>)**

| Atom | X           | Y           | Z           | SBOs | NACs  |
|------|-------------|-------------|-------------|------|-------|
| B    | 0.0000000   | 1.85406700  | -0.35538500 | 3.75 | -0.20 |
| B    | 1.60566900  | -0.92703400 | -0.35538500 | 3.76 | -0.20 |
| B    | -1.60566900 | -0.92703400 | -0.35538500 | 3.76 | -0.20 |
| B    | -1.07198800 | -1.49657700 | 1.02110500  | 3.84 | -0.45 |
| B    | -0.76008000 | 1.67665700  | 1.02110500  | 3.84 | -0.45 |
| B    | 1.83206800  | -0.18008000 | 1.02110500  | 3.84 | -0.45 |
| B    | -0.87470300 | -0.36686000 | -1.70269300 | 3.85 | -0.30 |
| B    | 0.75506200  | -0.57408500 | -1.70269300 | 3.85 | -0.30 |
| B    | 0.11964100  | 0.94094500  | -1.70269300 | 3.85 | -0.30 |
| B    | 0.73299700  | 0.98678700  | 0.97153400  | 3.89 | -0.12 |
| B    | 0.48808400  | -1.12818800 | 0.97153400  | 3.89 | -0.12 |
| B    | -1.22108100 | 0.14140100  | 0.97153400  | 3.89 | -0.12 |
| Li   | 0.00000000  | 0.00000000  | 2.82640200  | 0.40 | 0.82  |
| Li   | -2.03102700 | 1.34092300  | -0.83306900 | 0.46 | 0.81  |
| Li   | -0.14576000 | -2.42938300 | -0.83306900 | 0.46 | 0.81  |
| Li   | 2.17678700  | 1.08845900  | -0.83306900 | 0.46 | 0.80  |

**5A (B<sub>12</sub>Li<sub>5</sub>)**

| Atom | X           | Y           | Z           | SBOs | NACs  |
|------|-------------|-------------|-------------|------|-------|
| B    | -0.84892200 | -2.02449100 | -0.25792600 | 3.76 | -0.18 |
| B    | 2.11098500  | -1.37640300 | 0.12142900  | 3.78 | -0.25 |
| B    | -2.14547700 | -1.20804500 | 0.07517800  | 3.82 | -0.47 |
| B    | 0.72093900  | -2.05073000 | 0.03407900  | 3.84 | -0.33 |
| B    | -0.41517700 | 0.86696000  | 1.06415000  | 3.88 | -0.60 |
| B    | -1.44094200 | 1.58261900  | -0.09934700 | 3.89 | -0.55 |
| B    | 2.51940600  | 0.08330400  | -0.27469700 | 3.92 | -0.32 |
| B    | -2.09757600 | 0.29267400  | 0.64467800  | 3.93 | -0.21 |
| B    | 1.65278200  | 1.31081900  | -0.65436500 | 3.94 | -0.56 |
| B    | 0.01953400  | 1.23668400  | -0.86038400 | 4.06 | -0.25 |
| B    | -0.79105200 | -0.20600200 | -0.41770100 | 4.12 | -0.07 |
| B    | 0.83959400  | -0.12786200 | 0.28714800  | 4.14 | -0.11 |
| Li   | -2.79035000 | 0.51044400  | -1.39353500 | 0.39 | 0.83  |
| Li   | 1.02397500  | -0.71294200 | -1.84711600 | 0.40 | 0.84  |
| Li   | -0.58764400 | -1.19484700 | 1.79613600  | 0.43 | 0.83  |
| Li   | 0.27896500  | 2.98954400  | 0.29775100  | 0.55 | 0.72  |
| Li   | 1.86822900  | 1.10859000  | 1.70969800  | 0.58 | 0.69  |

**6A (B<sub>12</sub>Li<sub>6</sub>)**

| Atom | X           | Y           | Z           | SBOs | NACs  |
|------|-------------|-------------|-------------|------|-------|
| B    | 2.56887300  | 0.48745100  | -0.16765300 | 3.84 | -0.20 |
| B    | 0.95503300  | 0.06120700  | 0.35671600  | 3.87 | 0.04  |
| B    | -2.36761200 | 0.55685500  | 0.38032000  | 3.88 | -0.36 |
| B    | 2.23778600  | -0.99434600 | -0.43799900 | 3.91 | -0.46 |
| B    | 1.61836700  | 1.72641100  | -0.01133400 | 3.97 | -0.47 |
| B    | -1.54386800 | 1.83387000  | 0.01685700  | 4.00 | -0.53 |
| B    | -0.89306900 | 0.26462700  | -0.45715300 | 4.06 | 0.05  |
| B    | -0.71914400 | -1.36778200 | -0.89359700 | 4.14 | -0.75 |
| B    | 0.85453100  | -1.76566100 | -0.36232000 | 4.18 | -0.33 |
| B    | -1.79674500 | -0.96105800 | 0.46318600  | 4.24 | -0.47 |
| B    | -0.15711600 | -1.15169300 | 0.93858400  | 4.30 | -0.78 |
| B    | 0.04878300  | 1.70287100  | -0.24728100 | 4.69 | -0.59 |
| Li   | 0.93858900  | 0.20163700  | -1.87342500 | 0.39 | 0.85  |
| Li   | 0.11118500  | 3.60689700  | 0.26375600  | 0.44 | 0.79  |
| Li   | -2.65706100 | -0.66186400 | -1.50866200 | 0.45 | 0.81  |
| Li   | -0.66147800 | 0.79124700  | 1.81356800  | 0.46 | 0.83  |
| Li   | 1.83953100  | -1.55713400 | 1.64539600  | 0.50 | 0.78  |
| Li   | -0.91379800 | -3.03537100 | 0.36215700  | 0.50 | 0.80  |

**7A (B<sub>12</sub>Li<sub>7</sub>)**

| Atom | X           | Y           | Z           | SBOs | NACs  |
|------|-------------|-------------|-------------|------|-------|
| B    | -2.64822000 | -0.10028500 | -0.04285600 | 3.77 | -0.31 |
| B    | 0.71779200  | -2.04591800 | -0.34337200 | 3.78 | -0.22 |
| B    | -0.78361300 | -2.19489600 | 0.14767900  | 3.79 | -0.28 |
| B    | -2.20361300 | -1.56082700 | 0.26787900  | 3.80 | -0.29 |
| B    | -0.99076700 | -0.32990000 | 0.39173300  | 4.05 | -0.06 |
| B    | 2.01475700  | -1.16741500 | -0.42190200 | 4.08 | -0.51 |
| B    | 0.61195100  | -0.15436800 | -0.47309100 | 4.09 | 0.03  |
| B    | -0.28037800 | 1.14852200  | -1.16781100 | 4.12 | -0.67 |
| B    | -1.74806000 | 1.20718300  | -0.27539600 | 4.17 | -0.45 |
| B    | 2.21649400  | 0.36011500  | -0.05949800 | 4.24 | -0.63 |
| B    | 1.11854000  | 1.55930300  | -0.25971200 | 4.28 | -0.53 |
| B    | -0.27560900 | 1.21566000  | 0.75325100  | 4.34 | -0.82 |
| Li   | 1.61142800  | 0.64296000  | -2.21715000 | 0.41 | 0.84  |
| Li   | -1.21549900 | -0.89288400 | -1.74970300 | 0.44 | 0.82  |
| Li   | -2.08881800 | 0.94742700  | 1.88903700  | 0.49 | 0.78  |
| Li   | -0.51356600 | 3.05729700  | -0.25463000 | 0.49 | 0.80  |
| Li   | 3.49434500  | -0.93432700 | 1.27734800  | 0.77 | 0.46  |
| Li   | 0.74446100  | -0.96955700 | 1.66087700  | 0.83 | 0.57  |



|    |            |            |            |      |      |
|----|------------|------------|------------|------|------|
| Li | 1.71885900 | 1.58712800 | 1.86604800 | 0.90 | 0.47 |
|----|------------|------------|------------|------|------|

### 8A (B<sub>12</sub>Li<sub>8</sub>)

| Atom | X           | Y           | Z           | SBOs | NACs  |
|------|-------------|-------------|-------------|------|-------|
| B    | 2.38813300  | 0.00000000  | -0.33387000 | 4.01 | -0.97 |
| B    | -2.38813300 | 0.00000000  | -0.33387000 | 4.01 | -0.97 |
| B    | -0.83607500 | 0.00000000  | -1.17241500 | 4.02 | -0.06 |
| B    | 0.83607500  | 0.00000000  | -1.17241500 | 4.02 | -0.06 |
| B    | -1.29090000 | -1.04274100 | 0.36441300  | 4.14 | -0.24 |
| B    | 1.29090000  | -1.04274100 | 0.36441300  | 4.14 | -0.24 |
| B    | -1.29090000 | 1.04274100  | 0.36441300  | 4.14 | -0.24 |
| B    | 1.29090000  | 1.04274100  | 0.36441300  | 4.14 | -0.24 |
| B    | 0.00000000  | -1.48279800 | -0.73350400 | 4.21 | -0.82 |
| B    | 0.00000000  | 1.48279800  | -0.73350400 | 4.21 | -0.82 |
| B    | 0.00000000  | -0.83592400 | 1.53401100  | 4.23 | -0.74 |
| B    | 0.00000000  | 0.83592400  | 1.53401100  | 4.23 | -0.74 |
| Li   | 1.90890700  | 0.00000000  | 2.15835500  | 0.44 | 0.84  |
| Li   | -1.90890700 | 0.00000000  | 2.15835500  | 0.44 | 0.84  |
| Li   | -2.08130100 | -1.76207800 | -1.54227800 | 0.56 | 0.75  |
| Li   | 2.08130100  | -1.76207800 | -1.54227800 | 0.56 | 0.75  |
| Li   | -2.08130100 | 1.76207800  | -1.54227800 | 0.56 | 0.75  |
| Li   | 2.08130100  | 1.76207800  | -1.54227800 | 0.56 | 0.75  |
| Li   | 0.00000000  | 2.81901300  | 0.88778800  | 0.60 | 0.74  |
| Li   | 0.00000000  | -2.81901300 | 0.88778800  | 0.60 | 0.74  |

### 9A (B<sub>12</sub>Li<sub>9</sub>)

| Atom | X           | Y           | Z           | SBOs | NACs  |
|------|-------------|-------------|-------------|------|-------|
| B    | 2.48329500  | 0.00000000  | 0.10310600  | 3.91 | -0.94 |
| B    | -2.48329500 | 0.00000000  | 0.10310600  | 3.91 | -0.94 |
| B    | -1.31532500 | -1.02610400 | -0.46933300 | 4.11 | -0.21 |
| B    | -1.31532500 | 1.02610400  | -0.46933300 | 4.11 | -0.21 |
| B    | 1.31532500  | -1.02610400 | -0.46933300 | 4.11 | -0.21 |
| B    | 1.31532500  | 1.02610400  | -0.46933300 | 4.11 | -0.21 |
| B    | 0.00000000  | -1.46762800 | 0.66615900  | 4.17 | -0.76 |
| B    | 0.00000000  | 1.46762800  | 0.66615900  | 4.17 | -0.76 |
| B    | 0.00000000  | -0.83988400 | -1.57899400 | 4.23 | -0.73 |
| B    | 0.00000000  | 0.83988400  | -1.57899400 | 4.23 | -0.73 |
| B    | -0.89776600 | 0.00000000  | 1.06889200  | 4.36 | -0.37 |
| B    | 0.89776600  | 0.00000000  | 1.06889200  | 4.36 | -0.37 |
| Li   | -1.86842500 | 0.00000000  | -2.28877200 | 0.45 | 0.84  |

|    |             |             |             |      |      |
|----|-------------|-------------|-------------|------|------|
| Li | 1.86842500  | 0.00000000  | -2.28877200 | 0.45 | 0.84 |
| Li | 0.00000000  | -2.82587000 | -0.93992300 | 0.60 | 0.73 |
| Li | 0.00000000  | 2.82587000  | -0.93992300 | 0.60 | 0.73 |
| Li | -2.19544000 | -1.67250000 | 1.43293800  | 0.64 | 0.70 |
| Li | 2.19544000  | -1.67250000 | 1.43293800  | 0.64 | 0.70 |
| Li | 2.19544000  | 1.67250000  | 1.43293800  | 0.65 | 0.70 |
| Li | -2.19544000 | 1.67250000  | 1.43293800  | 0.65 | 0.70 |
| Li | 0.00000000  | 0.00000000  | 2.99065200  | 0.78 | 0.52 |

### 10A (B<sub>12</sub>Li<sub>10</sub>)

| Atom | X           | Y           | Z           | SBOs | NACs  |
|------|-------------|-------------|-------------|------|-------|
| B    | -1.28522900 | -0.35876700 | -0.92800300 | 3.99 | -0.30 |
| B    | -1.28522900 | -0.35876700 | 0.92800300  | 3.99 | -0.30 |
| B    | 0.06650200  | -1.75993500 | 0.00000000  | 4.03 | -0.03 |
| B    | 1.66018400  | -0.69242900 | 0.00000000  | 4.07 | -1.03 |
| B    | -0.55179100 | -1.68658700 | -1.57411400 | 4.13 | -1.01 |
| B    | -0.55179100 | -1.68658700 | 1.57411400  | 4.13 | -1.01 |
| B    | 0.82697500  | 0.77209600  | 0.00000000  | 4.18 | 0.05  |
| B    | 0.49532400  | -0.35862500 | 1.39845800  | 4.41 | -0.32 |
| B    | 0.49532400  | -0.35862500 | -1.39845800 | 4.41 | -0.32 |
| B    | -0.31395500 | 1.14501300  | -1.34483500 | 4.45 | -0.83 |
| B    | -0.31395500 | 1.14501300  | 1.34483500  | 4.45 | -0.83 |
| B    | 0.11752800  | 2.25162300  | 0.00000000  | 4.53 | -1.16 |
| Li   | -1.98333300 | -2.31268700 | 0.00000000  | 0.45 | 0.84  |
| Li   | -2.02673000 | 1.46206500  | 0.00000000  | 0.51 | 0.81  |
| Li   | 2.06374700  | 1.10888600  | -1.58479700 | 0.61 | 0.70  |
| Li   | 2.06374700  | 1.10888600  | 1.58479700  | 0.62 | 0.70  |
| Li   | -0.78558100 | -0.10363500 | -3.06660600 | 0.62 | 0.73  |
| Li   | -0.78558100 | -0.10363500 | 3.06660600  | 0.62 | 0.73  |
| Li   | 1.52742700  | -2.24275200 | -1.58641800 | 0.63 | 0.72  |
| Li   | 1.52742700  | -2.24275200 | 1.58641800  | 0.63 | 0.71  |
| Li   | -0.26713400 | 3.28495800  | -1.77081200 | 0.79 | 0.57  |
| Li   | -0.26713400 | 3.28495800  | 1.77081200  | 0.79 | 0.57  |

### 11A (B<sub>12</sub>Li<sub>11</sub>)

| Atom | X           | Y           | Z           | SBOs | NACs  |
|------|-------------|-------------|-------------|------|-------|
| B    | 0.68237600  | 0.85708000  | 0.00000000  | 4.00 | 0.06  |
| B    | -1.27453400 | -0.65549600 | -0.92531000 | 4.00 | -0.31 |
| B    | -1.27453400 | -0.65549600 | 0.92531000  | 4.00 | -0.31 |
| B    | 0.23988700  | -1.80246800 | 0.00000000  | 4.04 | -0.02 |
| B    | -0.35156400 | -1.84667600 | -1.58499400 | 4.09 | -1.01 |

|    |             |             |             |      |       |
|----|-------------|-------------|-------------|------|-------|
| B  | -0.35156400 | -1.84667600 | 1.58499400  | 4.09 | -1.01 |
| B  | 1.67092700  | -0.53060900 | 0.00000000  | 4.10 | -1.03 |
| B  | -0.55790500 | 0.98254300  | 1.32049000  | 4.36 | -0.74 |
| B  | -0.55790500 | 0.98254300  | -1.32049000 | 4.36 | -0.74 |
| B  | 0.47899100  | -0.36609800 | 1.37444900  | 4.36 | -0.29 |
| B  | 0.47899100  | -0.36609800 | -1.37444900 | 4.36 | -0.29 |
| B  | -0.39670200 | 2.13658900  | 0.00000000  | 4.42 | -1.05 |
| Li | -1.67889200 | -2.70274800 | 0.00000000  | 0.42 | 0.85  |
| Li | -2.34728200 | 0.99888600  | 0.00000000  | 0.48 | 0.82  |
| Li | 1.77761400  | -2.09100600 | -1.58380100 | 0.60 | 0.73  |
| Li | 1.77761400  | -2.09100600 | 1.58380100  | 0.61 | 0.72  |
| Li | -0.79583500 | -0.30920900 | -3.07367300 | 0.62 | 0.72  |
| Li | -0.79583500 | -0.30920900 | 3.07367300  | 0.62 | 0.72  |
| Li | -0.72878300 | 3.05732200  | -1.90285400 | 0.81 | 0.53  |
| Li | -0.72878300 | 3.05732200  | 1.90285400  | 0.81 | 0.53  |
| Li | 2.06563300  | 1.09761300  | -1.62925600 | 0.84 | 0.54  |
| Li | 2.06563300  | 1.09761300  | 1.62925600  | 0.84 | 0.54  |
| Li | 1.41147900  | 3.37919100  | 0.00000000  | 1.22 | 0.08  |

## 12A (B<sub>12</sub>Li<sub>12</sub>)

| Atom | X           | Y           | Z           | SBOs | NACs  |
|------|-------------|-------------|-------------|------|-------|
| B    | 0.53342500  | 0.85024600  | 0.00000000  | 3.89 | 0.12  |
| B    | -1.31262900 | -0.78379200 | -0.92112900 | 3.98 | -0.29 |
| B    | -1.31262900 | -0.78379200 | 0.92112900  | 3.98 | -0.29 |
| B    | 0.29066500  | -1.81877800 | 0.00000000  | 4.02 | -0.02 |
| B    | -0.30585300 | -1.91183600 | -1.58839200 | 4.08 | -1.03 |
| B    | -0.30585300 | -1.91183600 | 1.58839200  | 4.08 | -1.03 |
| B    | 1.61286500  | -0.45479100 | 0.00000000  | 4.15 | -0.97 |
| B    | 0.39947700  | -0.37544500 | 1.36768200  | 4.34 | -0.27 |
| B    | 0.39947700  | -0.37544500 | -1.36768200 | 4.34 | -0.27 |
| B    | -0.72772600 | 0.89626300  | 1.32519900  | 4.37 | -0.79 |
| B    | -0.72772600 | 0.89626300  | -1.32519900 | 4.37 | -0.79 |
| B    | -0.59808900 | 2.07413700  | 0.00000000  | 4.40 | -1.06 |
| Li   | -1.54255500 | -2.87385900 | 0.00000000  | 0.43 | 0.85  |
| Li   | -2.49461900 | 0.80032600  | 0.00000000  | 0.47 | 0.82  |
| Li   | 1.84290800  | -1.98531400 | -1.61760300 | 0.60 | 0.72  |
| Li   | 1.84290800  | -1.98531400 | 1.61760300  | 0.60 | 0.72  |
| Li   | -0.86272600 | -0.41258100 | -3.07911100 | 0.63 | 0.71  |
| Li   | -0.86272600 | -0.41258100 | 3.07911100  | 0.63 | 0.71  |
| Li   | -1.06078100 | 2.99471400  | -1.87114600 | 0.81 | 0.53  |
| Li   | -1.06078100 | 2.99471400  | 1.87114600  | 0.81 | 0.53  |
| Li   | 1.49005500  | 1.40100900  | -1.91905600 | 1.02 | 0.42  |
| Li   | 1.49005500  | 1.40100900  | 1.91905600  | 1.03 | 0.42  |

|    |            |            |            |      |      |
|----|------------|------------|------------|------|------|
| Li | 3.41667800 | 0.84769500 | 0.00000000 | 1.08 | 0.18 |
| Li | 1.22590800 | 3.39485700 | 0.00000000 | 1.27 | 0.07 |

### 13A (B<sub>12</sub>Li<sub>13</sub>)

| Atom | X           | Y           | Z           | SBOs | NACs  |
|------|-------------|-------------|-------------|------|-------|
| B    | -0.06751300 | -0.62170500 | 0.29160500  | 3.96 | -0.23 |
| B    | -0.84377400 | -2.11164000 | -0.40490600 | 4.02 | -0.36 |
| B    | -1.45733800 | 0.50347400  | 0.30941600  | 4.12 | -0.16 |
| B    | 0.66188100  | -2.26122400 | -0.16547200 | 4.15 | -0.54 |
| B    | 1.43975200  | 0.29295000  | 0.31580200  | 4.17 | -0.17 |
| B    | 2.09534500  | -1.52052100 | -0.19867400 | 4.17 | -0.31 |
| B    | -2.20141100 | -1.25015800 | -0.40600400 | 4.18 | -0.34 |
| B    | 3.01579500  | -0.26389900 | -0.06019000 | 4.27 | -1.32 |
| B    | -3.06199800 | 0.01520500  | -0.07451500 | 4.29 | -1.36 |
| B    | 0.05757200  | 0.88306300  | -0.65720000 | 4.37 | -0.54 |
| B    | -0.77365800 | 2.11897300  | 0.29046000  | 4.50 | -1.07 |
| B    | 0.95187700  | 2.04307600  | 0.30813400  | 4.59 | -1.20 |
| Li   | 4.29782200  | -1.52495500 | -0.98024300 | 0.54 | 0.74  |
| Li   | -4.54171200 | -1.18459800 | -0.71996400 | 0.55 | 0.73  |
| Li   | 3.00365000  | 1.70776400  | 0.95968500  | 0.72 | 0.66  |
| Li   | -2.93841300 | 2.10653600  | 0.44412800  | 0.74 | 0.66  |
| Li   | 0.18894800  | 3.87398300  | 0.99408200  | 0.74 | 0.62  |
| Li   | 0.67220500  | -0.90310200 | -1.88784700 | 0.75 | 0.62  |
| Li   | -1.83988000 | 0.60234100  | -1.86632200 | 0.76 | 0.62  |
| Li   | -0.00626600 | 0.96156500  | 1.95939700  | 0.83 | 0.60  |
| Li   | -0.43143500 | -3.67008700 | 1.24938300  | 0.86 | 0.34  |
| Li   | -0.01252100 | 2.90318100  | -1.59540000 | 0.88 | 0.52  |
| Li   | 2.27901100  | 1.34143500  | -1.44119400 | 0.89 | 0.56  |
| Li   | 1.42615300  | -1.40434400 | 1.88321600  | 0.92 | 0.47  |
| Li   | -1.79177800 | -1.18904300 | 1.75365400  | 0.98 | 0.45  |

### 14A (B<sub>12</sub>Li<sub>14</sub>)

| Atom | X           | Y           | Z           | SBOs | NACs  |
|------|-------------|-------------|-------------|------|-------|
| B    | -0.17465500 | 0.17098500  | 0.98572200  | 3.82 | 0.30  |
| B    | -0.17465500 | 0.17098500  | -0.98572200 | 3.82 | 0.30  |
| B    | 0.69158800  | 1.40712200  | 0.00000000  | 4.24 | -1.06 |
| B    | -1.82138500 | -0.06846200 | 1.52778200  | 4.37 | -0.89 |
| B    | -1.82138500 | -0.06846200 | -1.52778200 | 4.37 | -0.89 |
| B    | -1.35859600 | -0.73352700 | 0.00000000  | 4.39 | -0.71 |
| B    | 0.94979800  | -0.60276500 | 2.12172300  | 4.47 | -0.99 |
| B    | 0.94979800  | -0.60276500 | -2.12172300 | 4.47 | -0.99 |

|    |             |             |             |      |       |
|----|-------------|-------------|-------------|------|-------|
| B  | 1.66833100  | 0.23879200  | 0.86787600  | 4.57 | -0.59 |
| B  | 1.66833100  | 0.23879200  | -0.86787600 | 4.57 | -0.59 |
| B  | -0.58911200 | 0.03186900  | 2.68161000  | 4.64 | -1.08 |
| B  | -0.58911200 | 0.03186900  | -2.68161000 | 4.64 | -1.08 |
| Li | 0.68449800  | 1.79444200  | -2.19088400 | 0.66 | 0.71  |
| Li | 0.68449800  | 1.79444200  | 2.19088400  | 0.66 | 0.71  |
| Li | -0.87550000 | -2.05091100 | -1.79732800 | 0.70 | 0.67  |
| Li | -0.87550000 | -2.05091100 | 1.79732800  | 0.70 | 0.67  |
| Li | 0.60177800  | -0.60871100 | -4.26965200 | 0.72 | 0.61  |
| Li | 0.60177800  | -0.60871100 | 4.26965200  | 0.73 | 0.61  |
| Li | -1.52261200 | 1.73378500  | 0.00000000  | 0.75 | 0.65  |
| Li | -2.42682400 | 0.82140800  | -3.34024900 | 0.80 | 0.57  |
| Li | -2.42682400 | 0.82140800  | 3.34024900  | 0.81 | 0.57  |
| Li | -3.43090500 | -0.19601500 | 0.00000000  | 0.86 | 0.55  |
| Li | 3.08349700  | -0.97451000 | -1.84784200 | 0.89 | 0.46  |
| Li | 3.08349700  | -0.97451000 | 1.84784200  | 0.90 | 0.46  |
| Li | 2.87308300  | 1.84804500  | 0.00000000  | 0.90 | 0.49  |
| Li | 0.94729400  | -1.70663600 | 0.00000000  | 0.93 | 0.54  |

### 14C (B<sub>12</sub>Li<sub>14</sub>)

| Atom | X           | Y           | Z           | SBOs | NACs  |
|------|-------------|-------------|-------------|------|-------|
| B    | 1.01454500  | 0.16578600  | -1.37795000 | 4.18 | -0.52 |
| B    | -1.01454500 | -0.16578600 | 1.37795000  | 4.18 | -0.52 |
| B    | -0.65090800 | 0.79578900  | -1.37810000 | 4.18 | -0.52 |
| B    | 0.65090800  | -0.79578900 | 1.37810000  | 4.18 | -0.52 |
| B    | 0.36363800  | 0.96157500  | 1.37794900  | 4.18 | -0.52 |
| B    | -0.36363800 | -0.96157500 | -1.37794900 | 4.18 | -0.52 |
| B    | -1.07016900 | 1.30850400  | 0.27419700  | 4.20 | -0.52 |
| B    | 1.07016900  | -1.30850400 | -0.27419700 | 4.20 | -0.52 |
| B    | 0.59799800  | 1.58103000  | -0.27419900 | 4.20 | -0.52 |
| B    | -0.59799800 | -1.58103000 | 0.27419900  | 4.20 | -0.52 |
| B    | 1.66814100  | 0.27259400  | 0.27411300  | 4.20 | -0.52 |
| B    | -1.66814100 | -0.27259400 | -0.27411300 | 4.20 | -0.52 |
| Li   | -0.00084900 | -0.00124400 | -3.32146200 | 0.80 | 0.55  |
| Li   | 0.00084900  | 0.00124400  | 3.32146200  | 0.80 | 0.55  |
| Li   | -2.24354800 | -2.01180600 | -1.42444500 | 0.95 | 0.43  |
| Li   | -2.41687300 | -1.79955100 | 1.42414200  | 0.95 | 0.43  |
| Li   | 0.34883700  | -2.99374700 | -1.42247000 | 0.95 | 0.43  |
| Li   | -2.86488900 | 0.93568500  | 1.42274500  | 0.95 | 0.43  |
| Li   | 0.62312300  | -2.94871000 | 1.42278100  | 0.95 | 0.43  |
| Li   | -2.76741100 | 1.19247400  | -1.42474600 | 0.95 | 0.43  |
| Li   | 2.86488900  | -0.93568500 | -1.42274500 | 0.95 | 0.43  |
| Li   | -0.34883700 | 2.99374700  | 1.42247000  | 0.95 | 0.43  |
| Li   | 2.76741100  | -1.19247400 | 1.42474600  | 0.95 | 0.43  |

|    |             |            |             |      |      |
|----|-------------|------------|-------------|------|------|
| Li | 2.41687300  | 1.79955100 | -1.42414200 | 0.95 | 0.43 |
| Li | -0.62312300 | 2.94871000 | -1.42278100 | 0.95 | 0.43 |
| Li | 2.24354800  | 2.01180600 | 1.42444500  | 0.95 | 0.43 |

### 14C-T<sub>h</sub>(B<sub>12</sub>Li<sub>14</sub>)

| Atom | X           | Y           | Z           | SBOs | NACs  |
|------|-------------|-------------|-------------|------|-------|
| B    | 0.93436000  | 1.43657000  | 0.00000000  | 4.19 | -0.52 |
| B    | 1.43657000  | 0.00000000  | 0.93436000  | 4.19 | -0.52 |
| B    | 0.00000000  | 0.93436000  | 1.43657000  | 4.19 | -0.52 |
| B    | 1.43657000  | 0.00000000  | -0.93436000 | 4.19 | -0.52 |
| B    | 0.00000000  | -0.93436000 | 1.43657000  | 4.19 | -0.52 |
| B    | -0.93436000 | 1.43657000  | 0.00000000  | 4.19 | -0.52 |
| B    | 0.93436000  | -1.43657000 | 0.00000000  | 4.19 | -0.52 |
| B    | 0.00000000  | 0.93436000  | -1.43657000 | 4.19 | -0.52 |
| B    | -1.43657000 | 0.00000000  | 0.93436000  | 4.19 | -0.52 |
| B    | -1.43657000 | 0.00000000  | -0.93436000 | 4.19 | -0.52 |
| B    | -0.93436000 | -1.43657000 | 0.00000000  | 4.19 | -0.52 |
| B    | 0.00000000  | -0.93436000 | -1.43657000 | 4.19 | -0.52 |
| Li   | -1.91491900 | -1.91491900 | -1.91491900 | 0.91 | 0.47  |
| Li   | 1.91491900  | -1.91491900 | -1.91491900 | 0.91 | 0.47  |
| Li   | -1.91491900 | -1.91491900 | 1.91491900  | 0.91 | 0.47  |
| Li   | -1.91491900 | 1.91491900  | -1.91491900 | 0.91 | 0.47  |
| Li   | 1.91491900  | 1.91491900  | -1.91491900 | 0.91 | 0.47  |
| Li   | -1.91491900 | 1.91491900  | 1.91491900  | 0.91 | 0.47  |
| Li   | 1.91491900  | -1.91491900 | 1.91491900  | 0.91 | 0.47  |
| Li   | 1.91491900  | 1.91491900  | 1.91491900  | 0.91 | 0.47  |
| Li   | -3.36624400 | 0.00000000  | 0.00000000  | 0.94 | 0.41  |
| Li   | 0.00000000  | 0.00000000  | -3.36624400 | 0.94 | 0.41  |
| Li   | 0.00000000  | -3.36624400 | 0.00000000  | 0.94 | 0.41  |
| Li   | 0.00000000  | 0.00000000  | 3.36624400  | 0.94 | 0.41  |
| Li   | 0.00000000  | 3.36624400  | 0.00000000  | 0.94 | 0.41  |
| Li   | 3.36624400  | 0.00000000  | 0.00000000  | 0.94 | 0.41  |

### 3. Figures

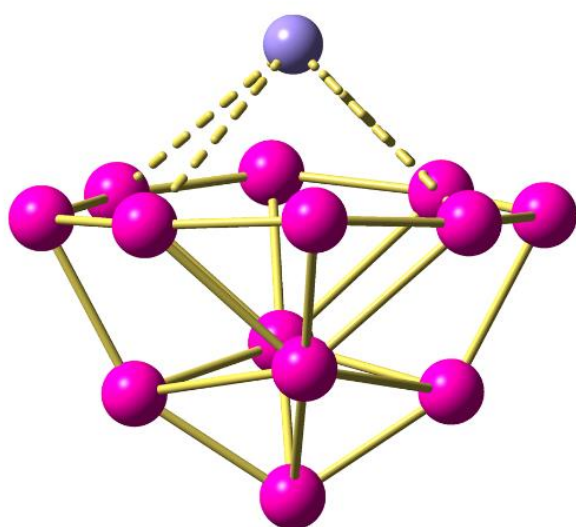

**B<sub>13</sub>Li**

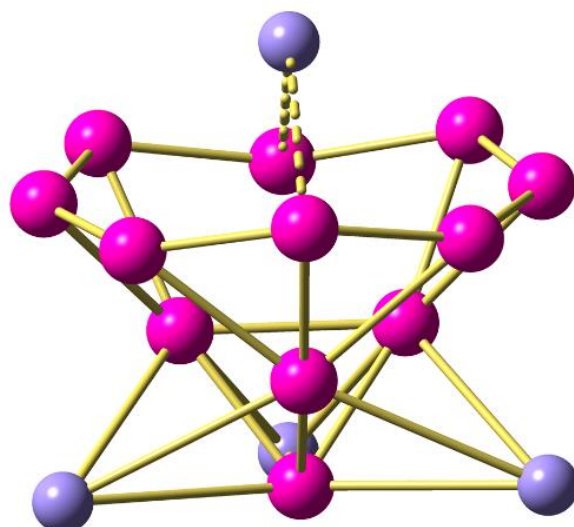

**B<sub>12</sub>Li<sub>4</sub>**

**Figure S2.** The lowest-energy structures of the isoelectronic B<sub>13</sub>Li and B<sub>12</sub>Li<sub>4</sub>.

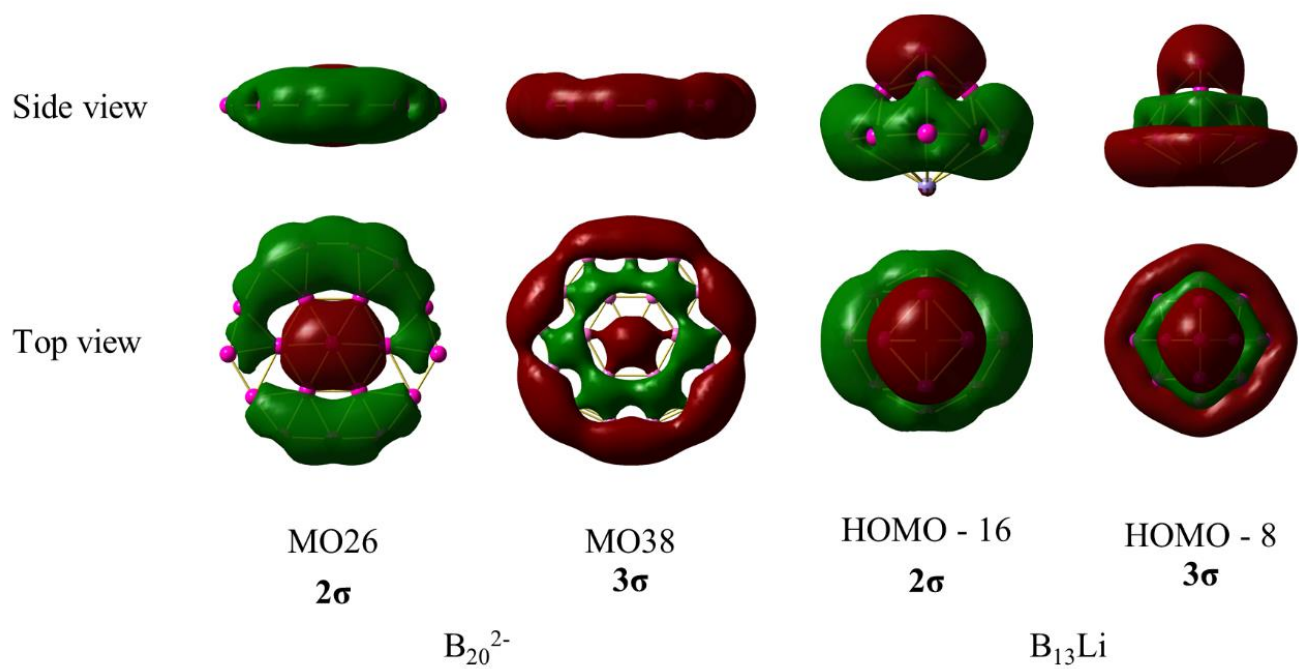

**Figure S3.** The  $2\sigma$  and  $3\sigma$ -orbitals of  $B_{20}^{2-}$  and  $B_{13}Li$  under the top view and the side view.



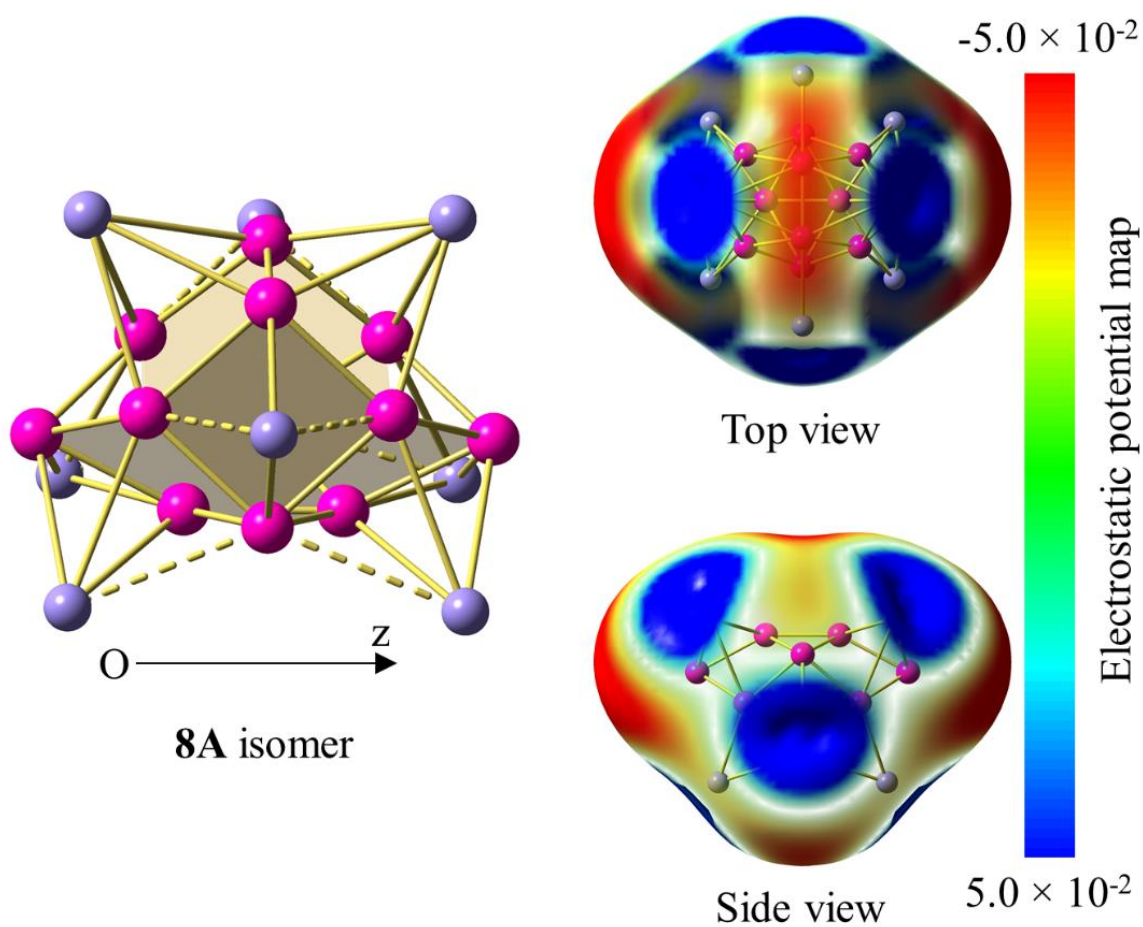

**Figure S4.**  $B_{12}Li_8$  **8A** and its electrostatic potential map on the 0.001 electron/bohr<sup>3</sup> isodensity surface.

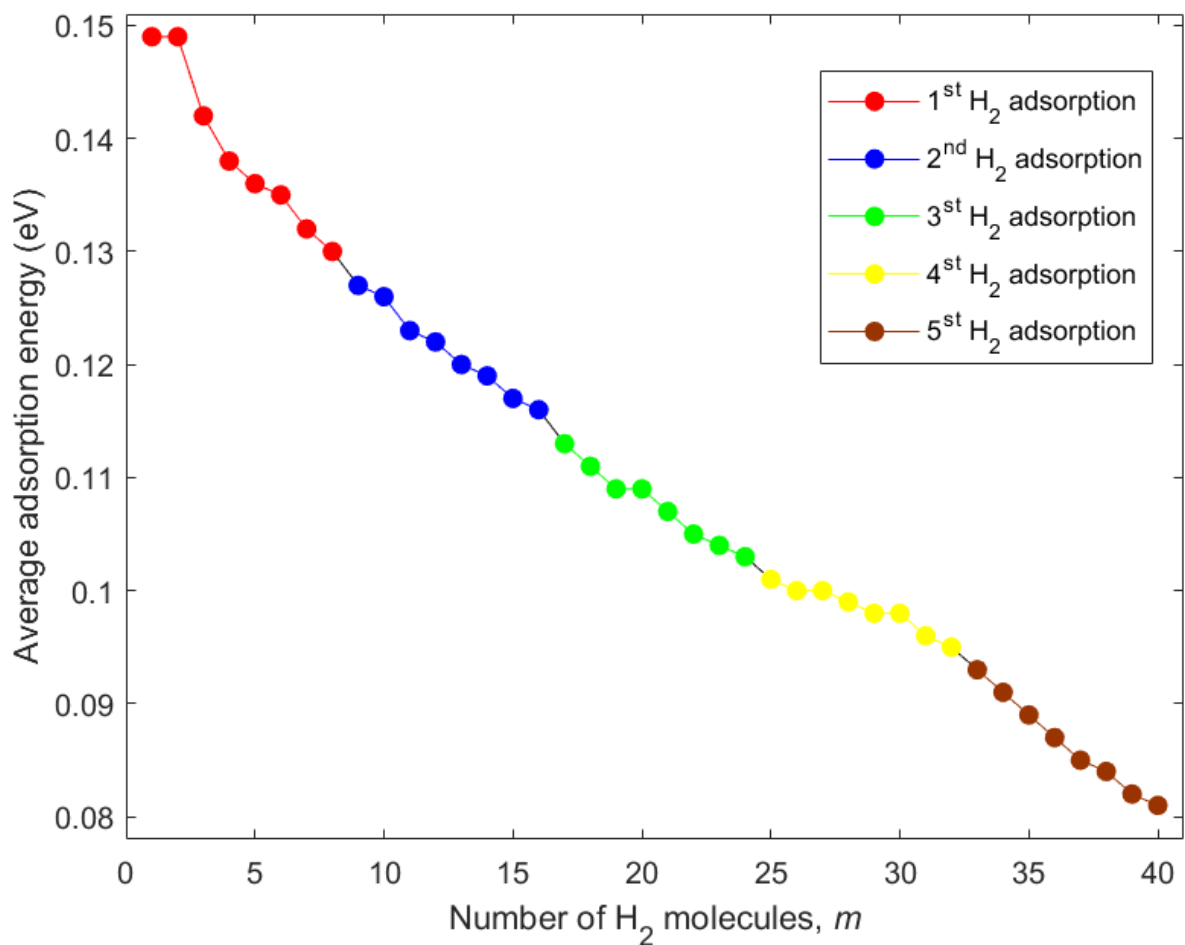

**Figure S5.** Average adsorption energies ( $E_{\text{abs}}$ , eV) per  $\text{H}_2$  molecule of  $\text{B}_{12}\text{Li}_8-m\text{H}_2$  calculated at the wB97XD/6-311+G(2d,2p) level.

## References

- 1 V. N. Staroverov, G. E. Scuseria, J. Tao and J. P. Perdew, *J. Chem. Phys.*, 2003, **119**, 12129–12137.
- 2 C. Adamo and V. Barone, *J. Chem. Phys.*, 1999, **110**, 6158–6170.
- 3 R. Krishnan, J. S. Binkley, R. Seeger and J. A. Pople, *J. Chem. Phys.*, 1980, **72**, 650–654.
- 4 T. Clark, J. Chandrasekhar, G. W. Spitznagel and P. V. R. Schleyer, *J. Comput. Chem.*, 1983, **4**, 294–301.

- 5 F. Weigend and R. Ahlrichs, *Phys. Chem. Chem. Phys.*, 2005, **7**, 3297.
- 6 F. Weigend, *Phys. Chem. Chem. Phys.*, 2006, **8**, 1057.
- 7 L. Cheng, *J. Chem. Phys.*, 2012, **136**, 104301.
- 8 Q. Chen, G.-F. Wei, W.-J. Tian, H. Bai, Z.-P. Liu, H.-J. Zhai and S.-D. Li, *Phys. Chem. Chem. Phys.*, 2014, **16**, 18282.
- 9 H. T. Pham and M. T. Nguyen, *Phys. Chem. Chem. Phys.*, 2015, **17**, 17335–17345.
- 10 D. T. T. Mai, L. V. Duong, M. P. Pham-Ho and M. T. Nguyen, *J. Phys. Chem. C*, 2020, **124**, 6770–6783.
- 11 T. B. Tai and M. T. Nguyen, *Nanoscale*, 2015, **7**, 3316–3317.
- 12 C. Li, Y. Cui, J. Li, J. Guo, L. Cheng, B. Ren and Y. Yuan, *Mol. Phys.*, 2021, e1910744.
- 13 L. Pei, M. Yan, X.-Y. Zhao, Y.-W. Mu, H.-G. Lu, Y.-B. Wu and S.-D. Li, *RSC Adv.*, 2020, **10**, 10129–10133.
- 14 A. V. Krukau, O. A. Vydrov, A. F. Izmaylov and G. E. Scuseria, *J. Chem. Phys.*, 2006, **125**, 224106.
- 15 Y. Zhao and D. G. Truhlar, *Theor. Chem. Acc.*, 2008, **120**, 215–241.
- 16 E. N. Koukaras, *Phys. Chem. Chem. Phys.*, 2018, **20**, 18556–18570.
- 17 L. Sai, X. Wu, N. Gao, J. Zhao and R. B. King, *Nanoscale*, 2017, **9**, 13905–13909.
- 18 X. Dong, S. Jalife, A. Vázquez-Espinal, E. Ravell, S. Pan, J. L. Cabellos, W. Y. Liang, Z. H. Cui and G. Merino, *Angew. Chem. Int. Ed.*, 2018, **57**, 4627–4631.
- 19 A. D. Becke, *J. Chem. Phys.*, 1993, **98**, 5648–5652.
- 20 C. Lee, W. Yang and R. G. Parr, *Phys. Rev. B*, 1988, **37**, 785–789.
- 21 J.-D. Chai and M. Head-Gordon, *J. Chem. Phys.*, 2008, **128**, 084106.
- 22 J.-D. Chai and M. Head-Gordon, *Phys. Chem. Chem. Phys.*, 2008, **10**, 6615.
